# Supplementary material for: A new mechanism for visible light photocatalysis: generation of intraband by adsorbed organic compounds with wide-bandgap semiconductors
Source: Royal Society of Chemistry journal article supplement (doi:10.1039/d4en00151f), 2024-01-01
Supplement: d4en00151f1.pdf [file d4en00151f1.pdf]

## Supporting Information

### **A new mechanism for visible light photocatalysis: Generation of intraband by adsorbed organic compounds with wide-bandgap semiconductors**

*Teng Wang*<sup>a, #</sup>, *Jiachun Cao*<sup>a, b #</sup>, *Juan Li*<sup>b</sup>, *Juntian Li*<sup>b</sup>, *Didi Li*<sup>a</sup>, *Shaobin Wang*<sup>c</sup>,  
*Zhimin Ao*<sup>b, a\*</sup>

<sup>a</sup> Guangdong-Hong Kong-Macao Joint Laboratory for Contaminants Exposure and Health, Guangdong Key Laboratory of Environmental Catalysis and Health Risk Control, Key Laboratory for City Cluster Environmental Safety and Green Development of the Ministry of Education, Institute of Environmental Health and Pollution Control, School of Environmental Science and Engineering, Guangdong University of Technology, Guangzhou 510006, China

<sup>b</sup> Advanced Interdisciplinary Institute of Environment and Ecology, Beijing Normal University, Zhuhai 519087, China

<sup>c</sup> School of Chemical Engineering, The University of Adelaide, Adelaide, SA 5005, Australia.

# These authors contributed equally

\* Corresponding authors: E-mail: zhimin.ao@bnu.edu.cn (ZA)

**Pages - 24**

**Table - 5**

**Fig.s - 16**

**Table S1.** The models and software parameters used in our surface calculations.

| Type                           | Miller index | Terminate | Supercell | Reference    | K-mesh    |           |
|--------------------------------|--------------|-----------|-----------|--------------|-----------|-----------|
|                                |              |           |           |              | Relax     | SCF       |
| A-TiO <sub>2</sub>             | 101          | O-Ti-O    | 1 × 4 × 3 | <sup>1</sup> | 2 × 2 × 1 | 3 × 3 × 1 |
| R-TiO <sub>2</sub>             | 110          | O-Ti-O    | 4 × 2 × 3 | <sup>2</sup> | 2 × 2 × 1 | 3 × 3 × 1 |
| La <sub>2</sub> O <sub>3</sub> | 001          | La-O      | 2 × 3 × 2 | <sup>3</sup> | 2 × 2 × 1 | 2 × 3 × 1 |
| Sb <sub>2</sub> O <sub>3</sub> | 111          | Sb-O, Sb  | 1 × 1 × 2 | <sup>4</sup> | 2 × 2 × 1 | 2 × 2 × 1 |

**Table S2.** Information on oxidation products of styrene by visible light photolysis of TiO<sub>2</sub> detected by PTR-ToF-MS.

| Entry | m/z     | Name         | Formula                                      | Reference |
|-------|---------|--------------|----------------------------------------------|-----------|
| 1     | 43.017  | ketene       | C <sub>2</sub> H <sub>2</sub> O              | 5         |
| 2     | 45.019  | acetaldehyde | C <sub>2</sub> H <sub>4</sub> O              | 5, 6      |
| 3     | 47.044  | ethanol      | C <sub>2</sub> H <sub>6</sub> O              | 5         |
| 4     | 59.059  | acetone      | C <sub>3</sub> H <sub>6</sub> O              | 5, 6      |
| 5     | 61.063  | acetic acid  | C <sub>2</sub> H <sub>4</sub> O <sub>2</sub> | 5, 6      |
| 6     | 79.054  | benzene      | C <sub>6</sub> H <sub>6</sub>                | 5, 6      |
| 7     | 95.061  | phenol       | C <sub>6</sub> H <sub>6</sub> O              | 5, 6      |
| 8     | 105.067 | styrene      | C <sub>8</sub> H <sub>8</sub>                | 5         |

**Table S3.** The experimental and calculated CBM and VBM (eV).

|                                | Exp.  |      | Miller index | Cal.  |      |
|--------------------------------|-------|------|--------------|-------|------|
|                                | CBM   | VBM  |              | CBM   | VBM  |
| A-TiO <sub>2</sub>             | -0.72 | 2.55 | 101          | -0.62 | 2.56 |
| R-TiO <sub>2</sub>             | -0.25 | 2.77 | 110          | -0.17 | 2.78 |
| La <sub>2</sub> O <sub>3</sub> | -3.39 | 2.74 | 001          | -2.71 | 1.28 |
| Sb <sub>2</sub> O <sub>3</sub> | -1.81 | 2.23 | 111          | -1.74 | 1.68 |

**Table S4.** The experimental and calculated band gap energy (eV).

|                                | Exp. | Cal.             |      |         |
|--------------------------------|------|------------------|------|---------|
|                                |      | $U_{\text{eff}}$ | Bulk | Surface |
| A-TiO <sub>2</sub>             | 3.27 | 7.5              | 3.24 | 3.18    |
| R-TiO <sub>2</sub>             | 3.02 | 9.5              | 3.02 | 2.94    |
| La <sub>2</sub> O <sub>3</sub> | 5.03 | 5.4              | 3.99 | 3.99    |
| Sb <sub>2</sub> O <sub>3</sub> | 4.04 | 4.5              | 3.38 | 3.43    |

**Table S5.** The adsorption energy ( $E_{\text{ads}}$ , eV) of VOC molecules on simulated surfaces.

|                                      | Styrene | Toluene | Benzene | Ethyl acetate |
|--------------------------------------|---------|---------|---------|---------------|
| A-TiO <sub>2</sub> (101)             | -1.021  | -0.531  | -0.692  | -1.005        |
| R-TiO <sub>2</sub> (110)             | -1.087  | -0.867  | -0.747  | -1.265        |
| La <sub>2</sub> O <sub>3</sub> (001) | -1.020  | -0.977  | -1.026  | -1.046        |
| Sb <sub>2</sub> O <sub>3</sub> (111) | -0.566  | -0.539  | -0.526  | -0.481        |

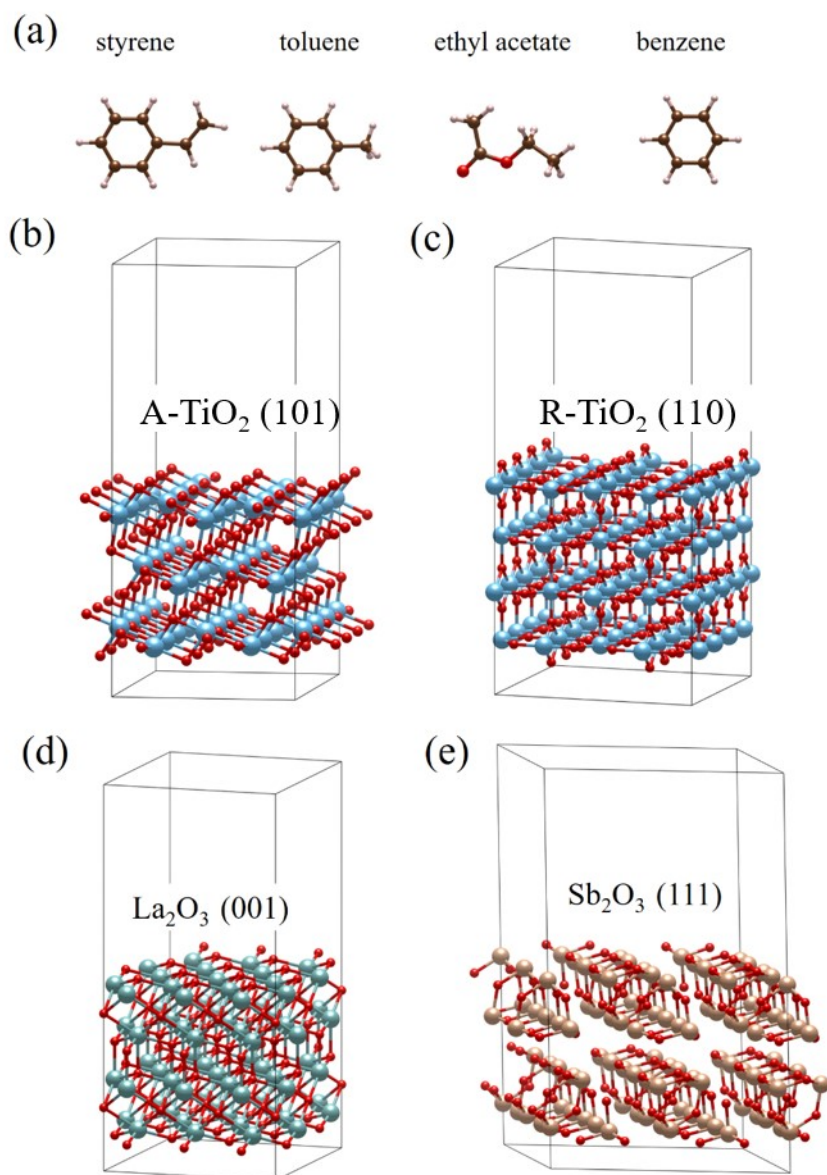

**Fig. S1.** The optimized structures of VOC molecules and semiconductor surfaces.



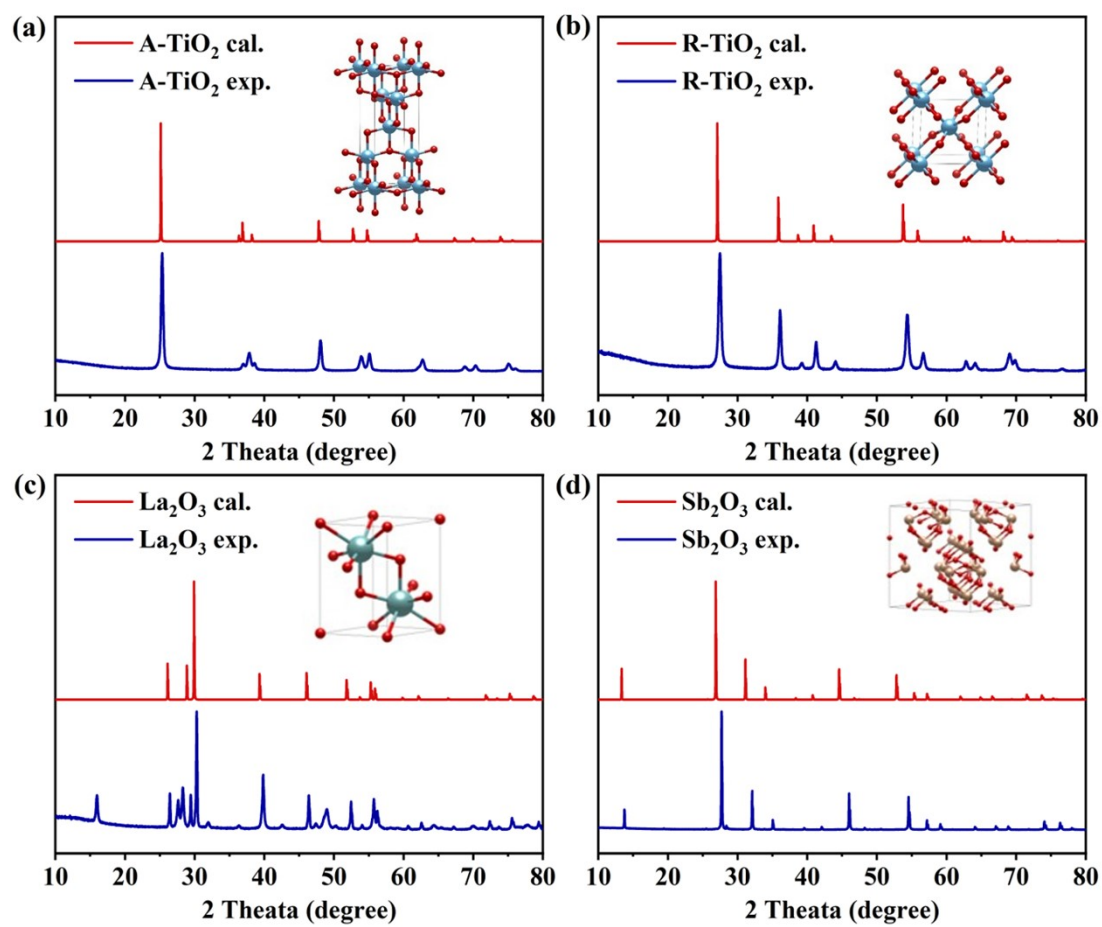

**Fig. S2.** Comparison of the experimental and calculated powder diffraction patterns of semiconductors.

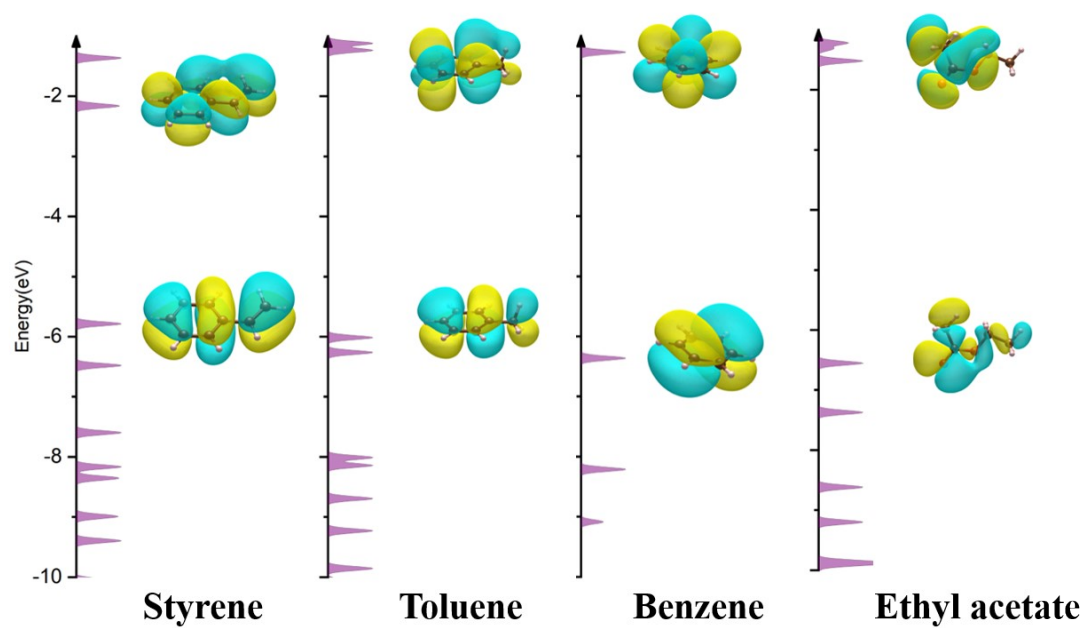

**Fig. S3.** DOS and charge distributions of front orbitals of VOC molecules in a vacuum state.

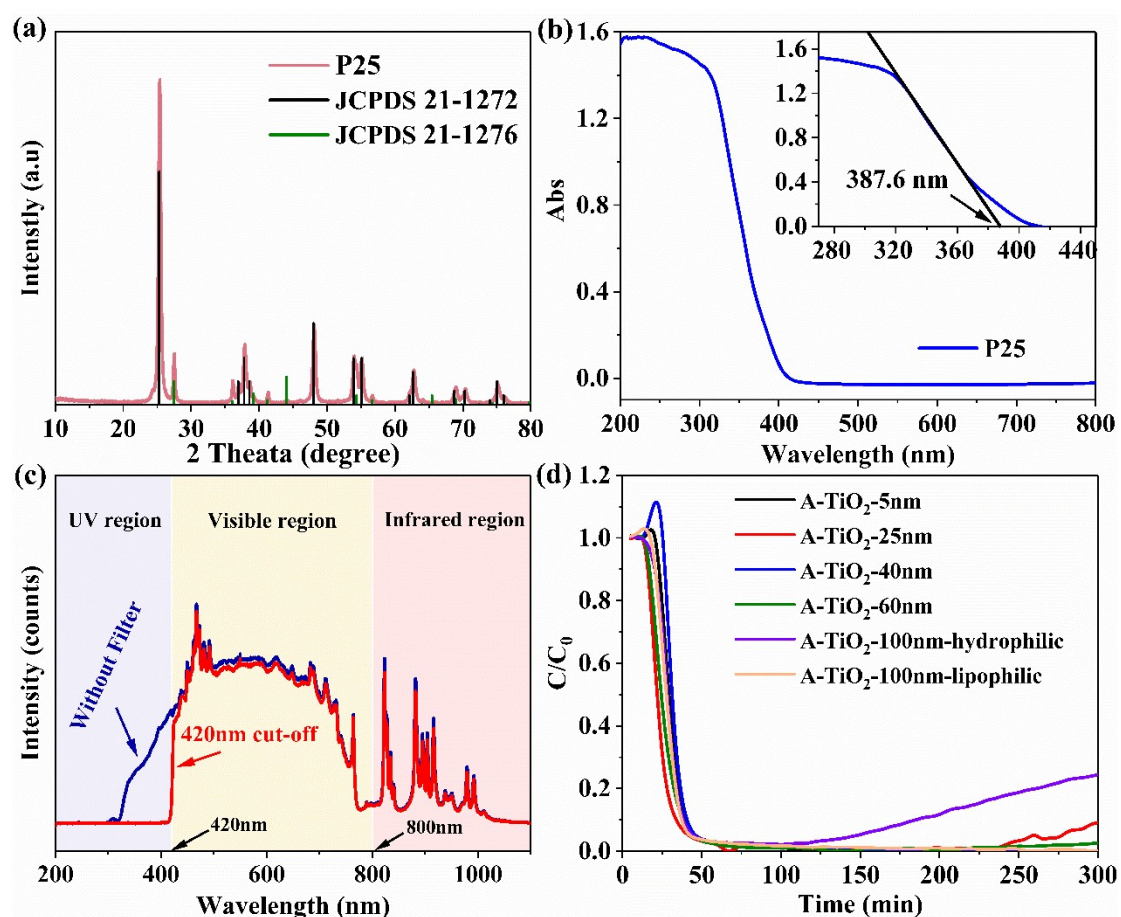

**Fig. S4** (a) XRD spectra of P25 obtained in this work and from the PDF cards; (b) UV-Vis diffuse reflection absorption patterns and absorption band edges of P25; (c) The spectral distribution of the Xenon light source without a filter and with a Cut 420 filter; (d) Degradation curves of styrene by A-TiO<sub>2</sub> with different particle sizes.

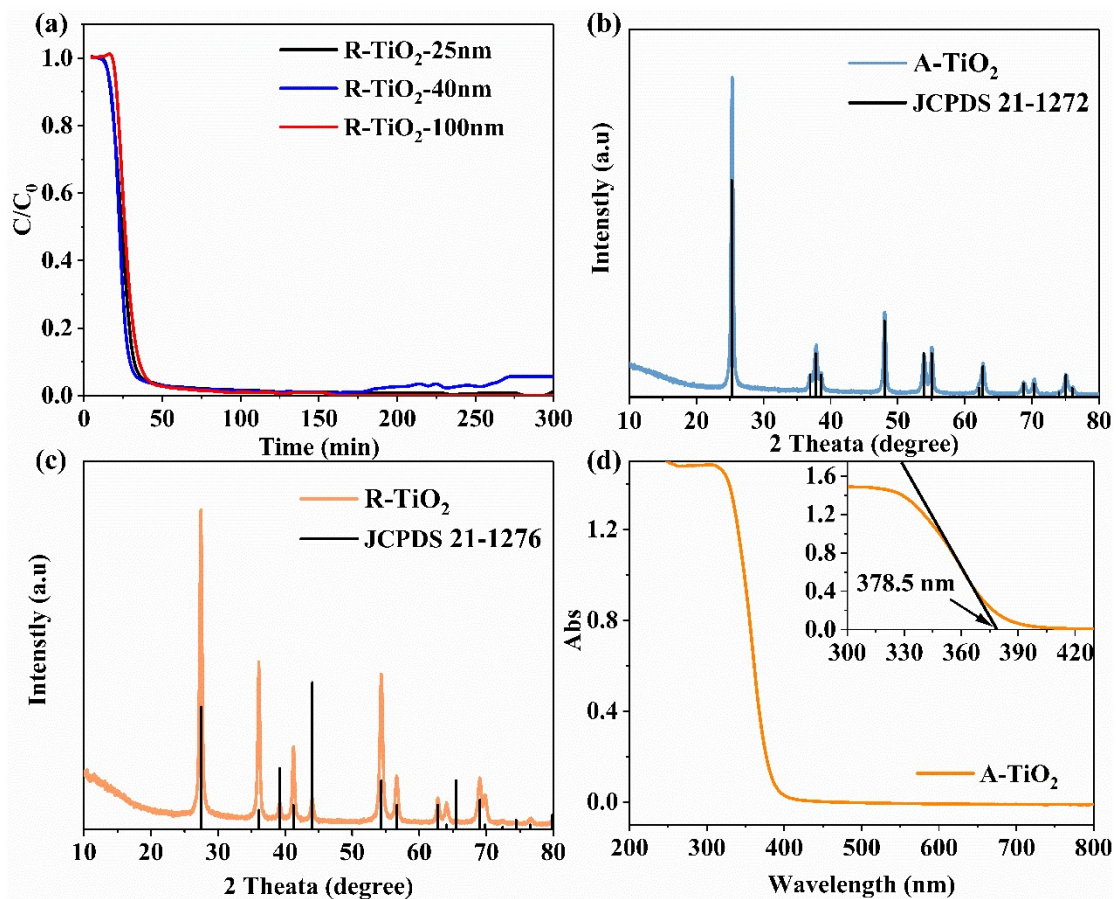

**Fig. S5.** (a) Degradation curves of styrene by R-TiO<sub>2</sub> with different particle sizes; XRD spectra of (b) A-TiO<sub>2</sub> and (c) R-TiO<sub>2</sub> obtained in this work and from the PDF cards; (d) UV-Vis diffuse reflection absorption patterns and absorption band edges of A-TiO<sub>2</sub>.

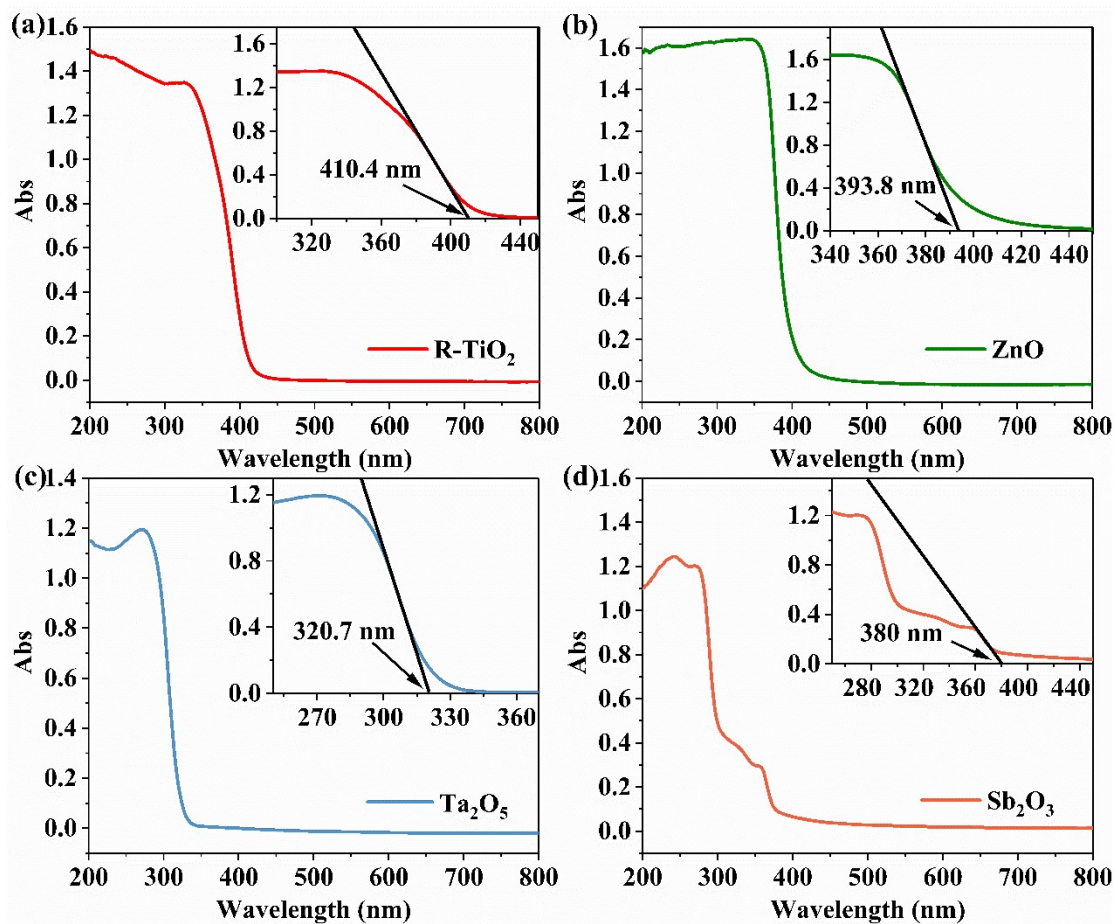

**Fig. S6.** UV-Vis diffuse reflection absorption patterns and absorption band edges of (a) R-TiO<sub>2</sub>, (b) ZnO, (c) Ta<sub>2</sub>O<sub>5</sub> and (d) Sb<sub>2</sub>O<sub>3</sub>.

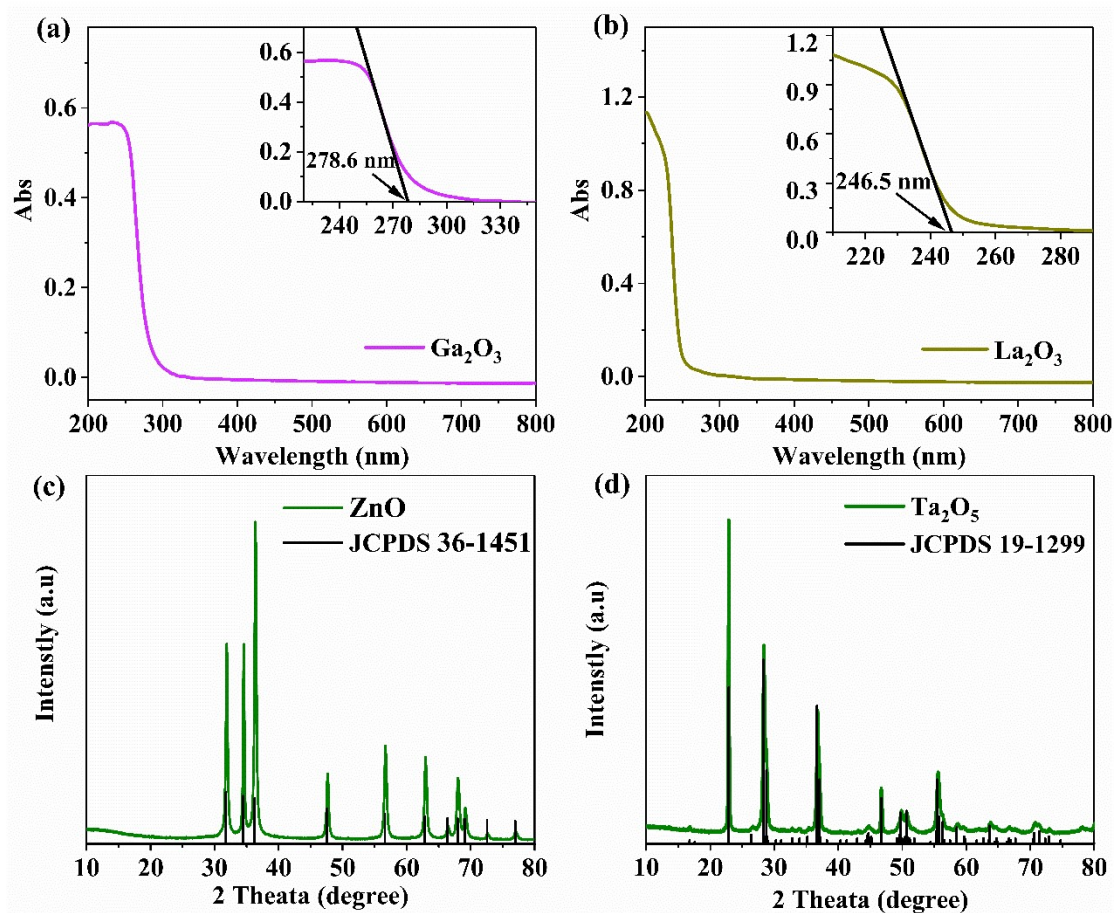

**Fig. S7.** UV-Vis diffuse reflection absorption patterns and absorption band edges of (a) Ga<sub>2</sub>O<sub>3</sub> and (b) La<sub>2</sub>O<sub>3</sub>; XRD spectra of (c) ZnO and (d) Ta<sub>2</sub>O<sub>5</sub> obtained in this work and from PDF cards.

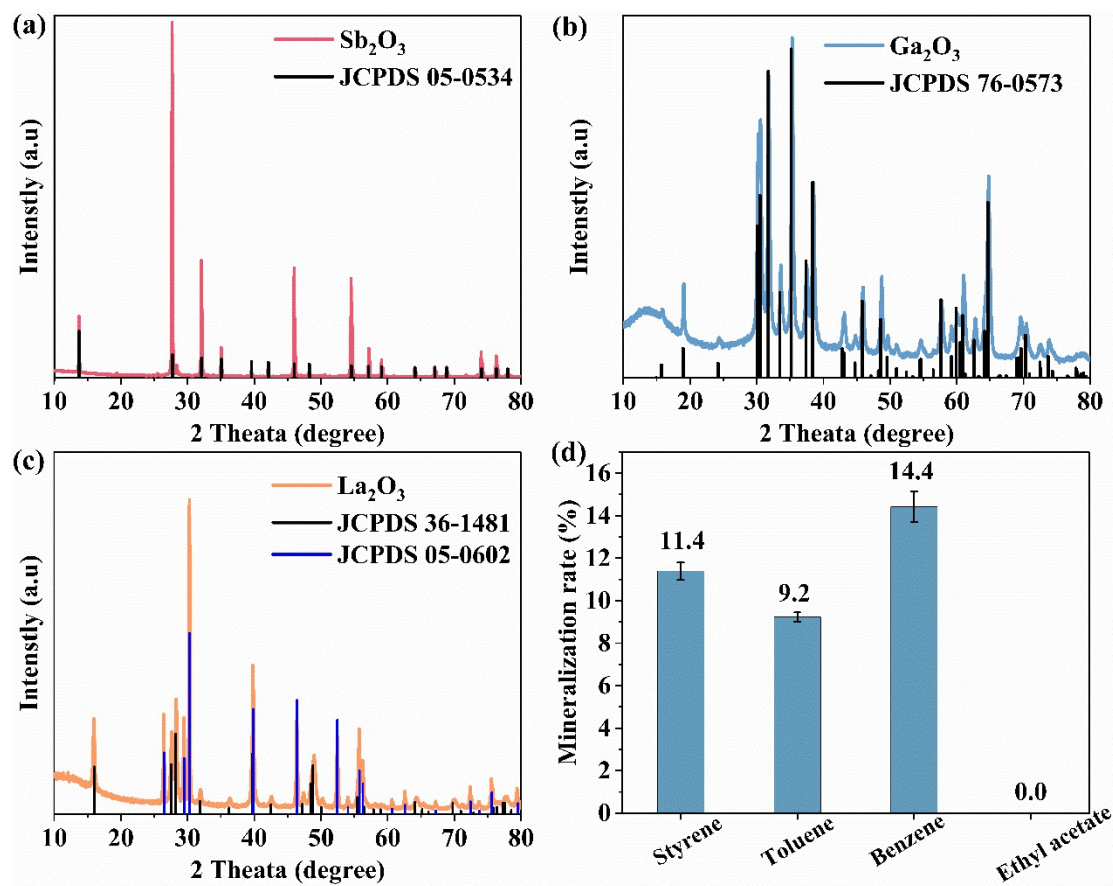

**Fig. S8.** XRD spectra of (a)  $\text{Sb}_2\text{O}_3$ , (b)  $\text{Ga}_2\text{O}_3$  and (c)  $\text{La}_2\text{O}_3$  obtained in this work and from PDF cards; (d) Histogram of the degradation mineralization rate of A- $\text{TiO}_2$  for different VOCs.

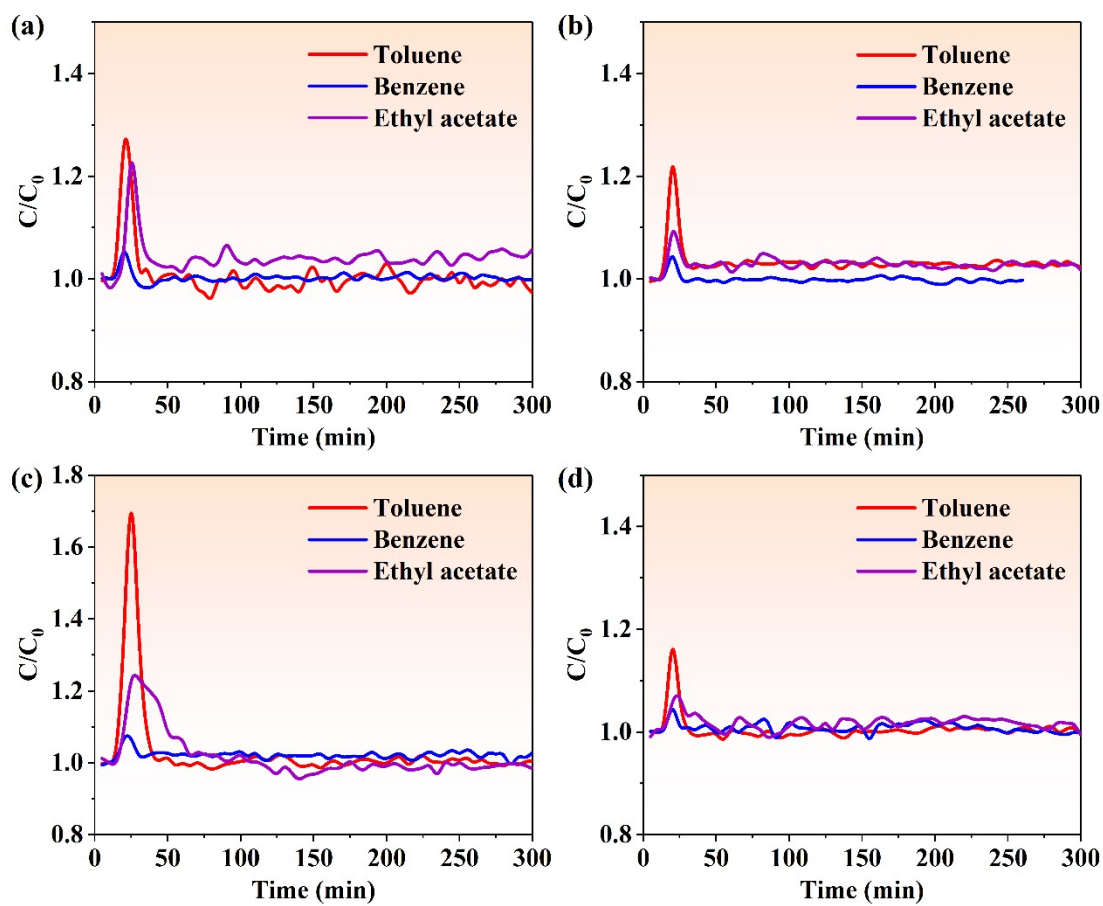

**Fig. S9.** Degradation curves of toluene, benzene and ethyl acetate by (a)  $Ta_2O_5$ , (b)  $Sb_2O_3$ , (c)  $Ga_2O_3$  and (d)  $La_2O_3$ .



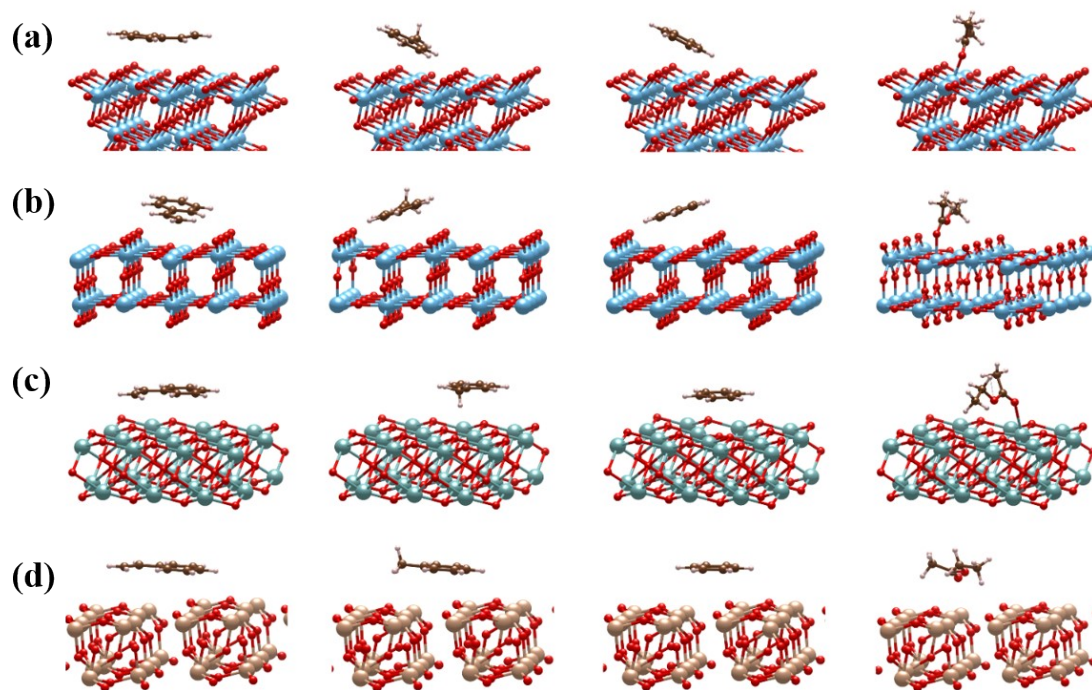

**Fig. S10.** The most stable adsorption configurations of styrene, toluene, benzene, and ethyl acetate on the simulated surfaces of (a) A-TiO<sub>2</sub>, (b) R-TiO<sub>2</sub>, (c) La<sub>2</sub>O<sub>3</sub>, and (d) Sb<sub>2</sub>O<sub>3</sub>, respectively.

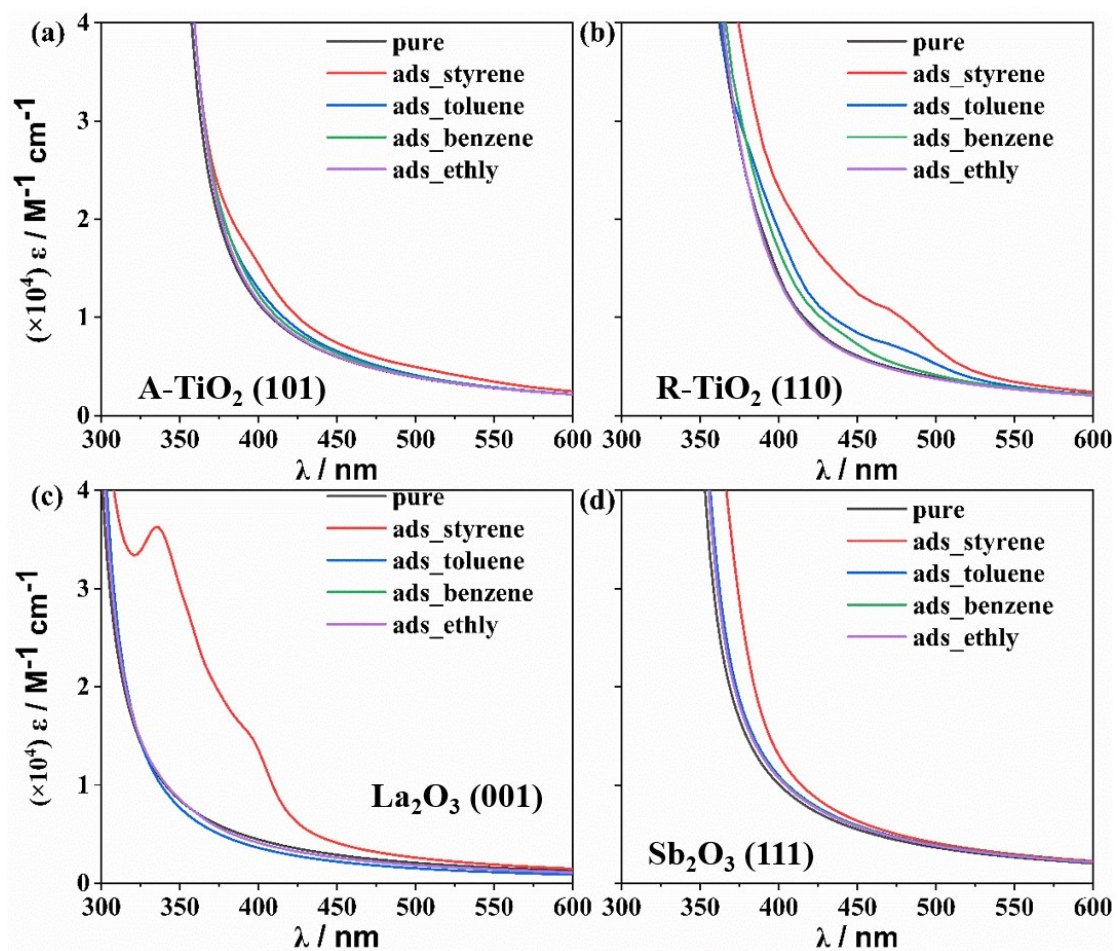

Fig. S11. Simulated absorption spectra of bare and modified semiconductor surfaces.

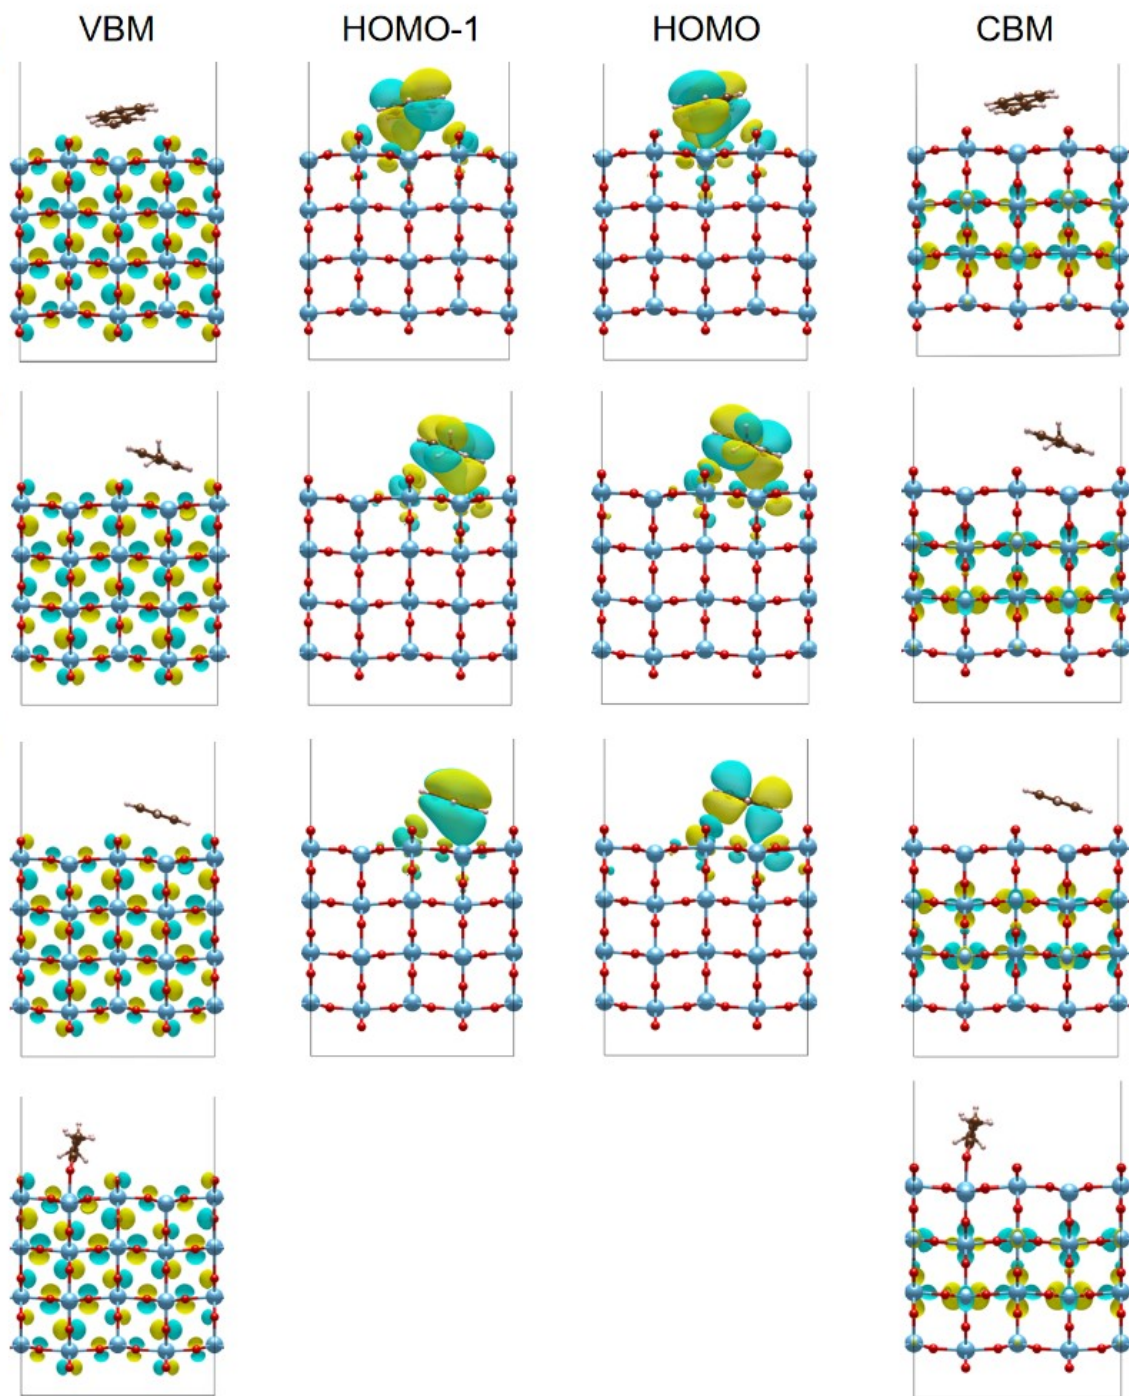

**Fig. S12.** The pivotal orbitals of A-TiO<sub>2</sub> (101) adsorption systems with adsorbing VOC molecules. VBM, CBM of semiconductor surfaces and molecule orbital existing in the semiconductor band gap.

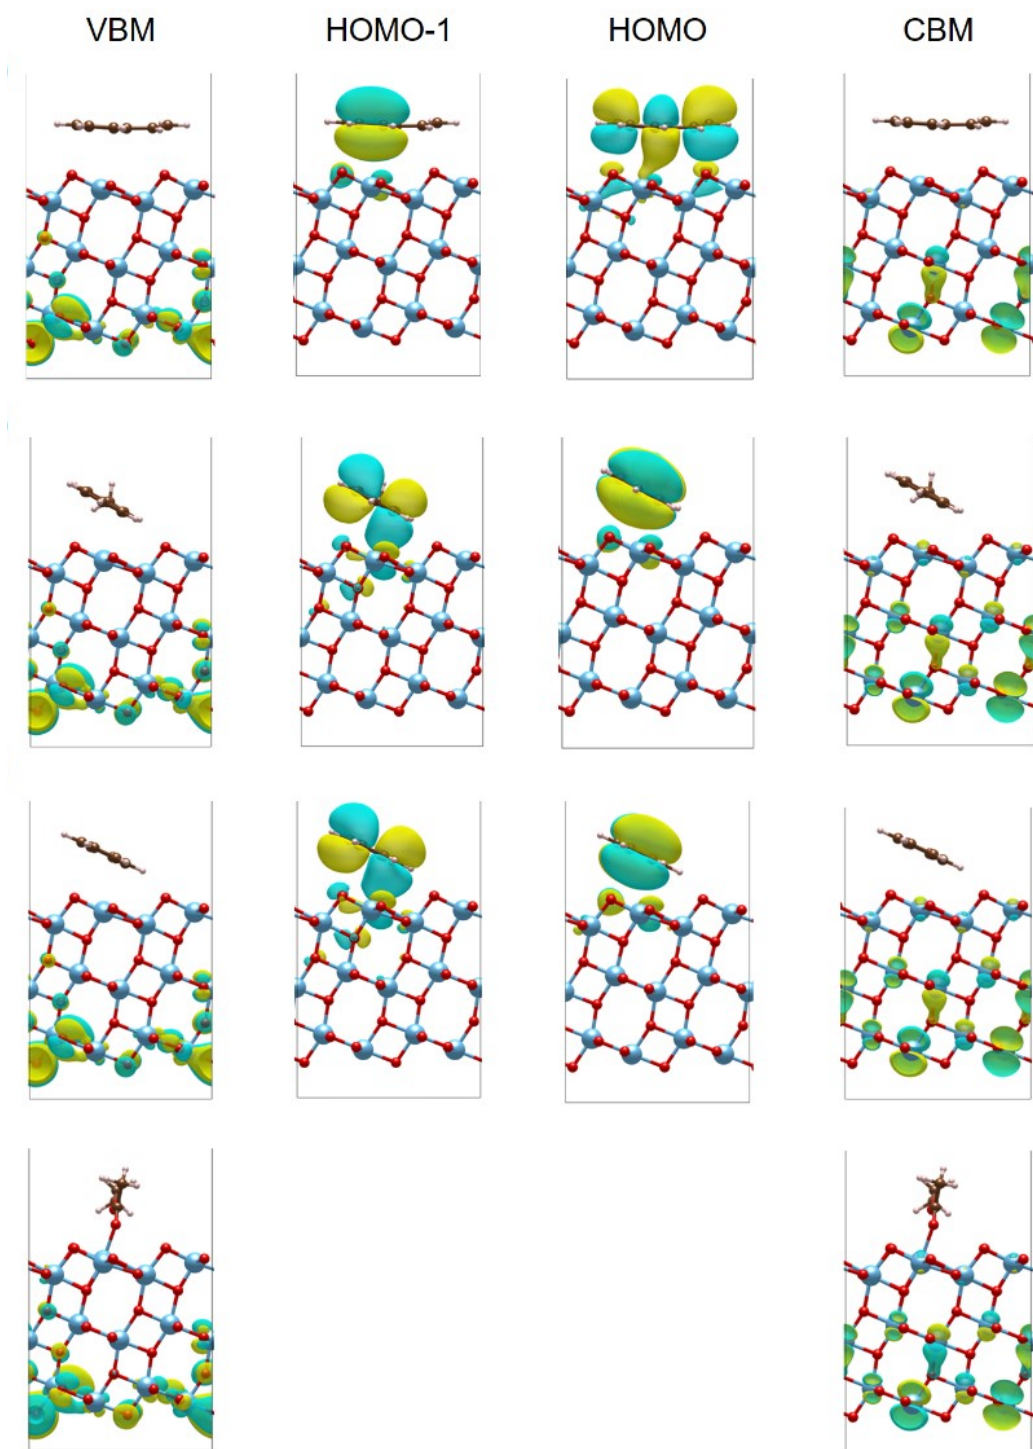

**Fig. S13.** The pivotal orbitals of R-TiO<sub>2</sub> (110) adsorption systems with adsorbing VOC molecules. VBM, CBM of semiconductor surfaces and molecule orbital existing in the semiconductor band gap.

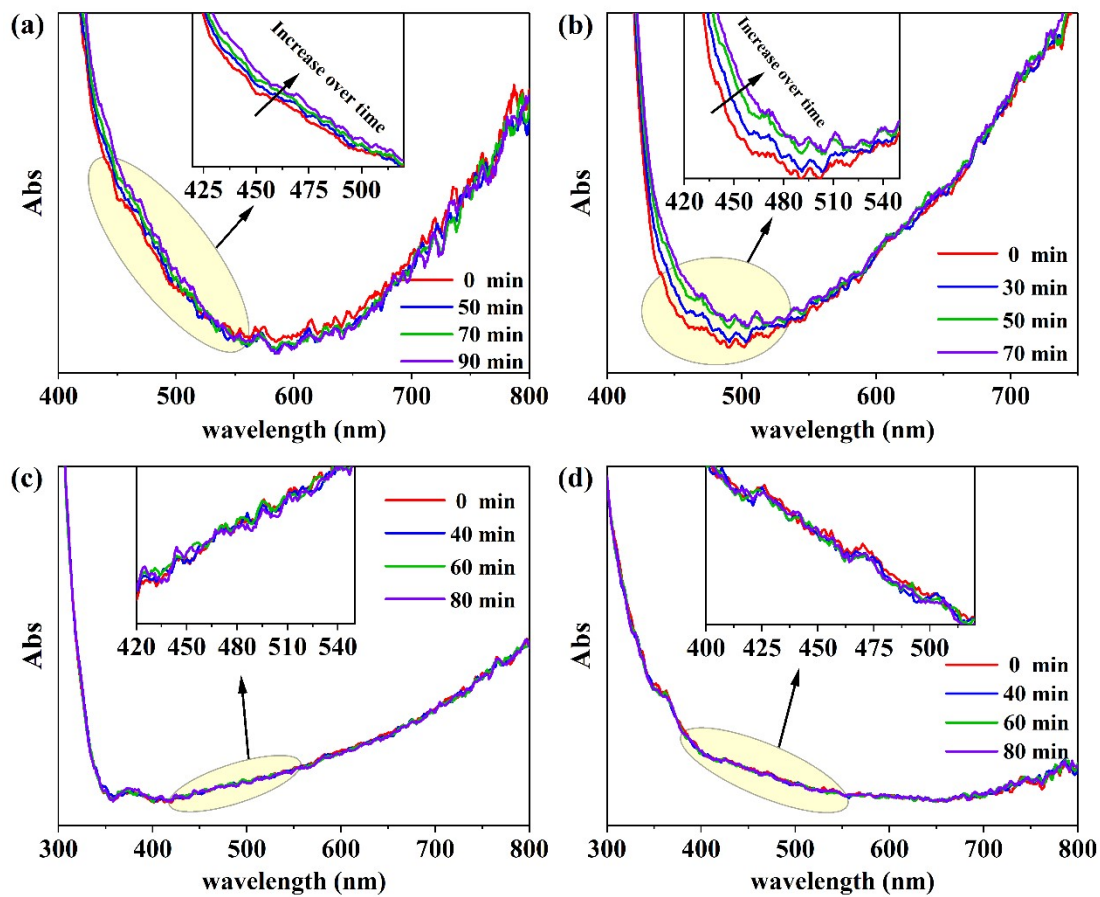

**Fig. S14.** *In situ* UV-Vis absorption spectra of (a) A-TiO<sub>2</sub>, (b) P25, (c) Ga<sub>2</sub>O<sub>3</sub> and (d) La<sub>2</sub>O<sub>3</sub> during continuous adsorption of toluene.

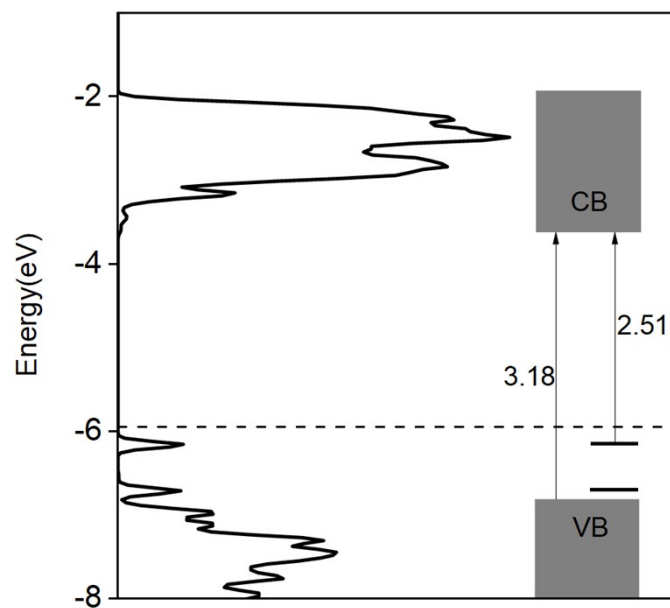

**Fig. S15.** DOS plot for phenol molecule adsorbed on A-TiO<sub>2</sub> (101) surface. The right end of the Fig. shows the position of the newly created midgap states in the electronic structure of the A-TiO<sub>2</sub> surface.

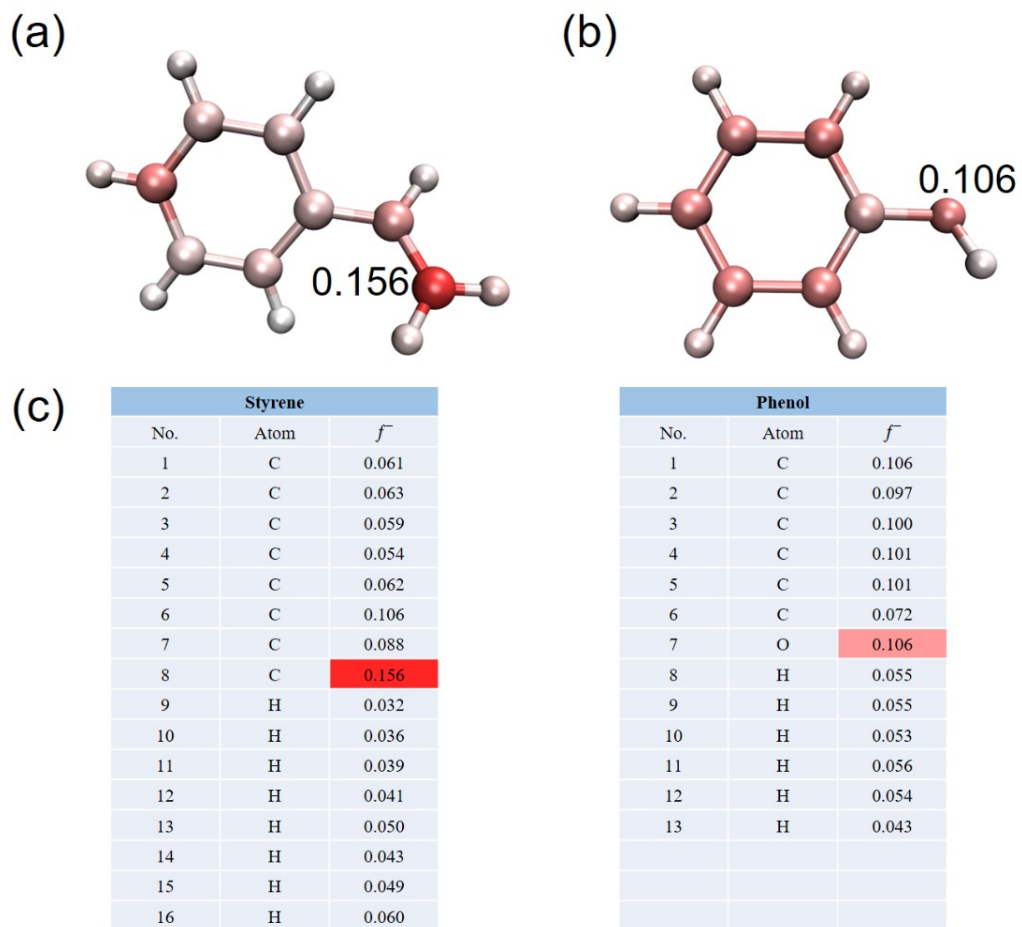

**Fig. S16.** Atomic structure of styrene (a) and phenol (b) colored according to Condensed Fukui function ( $f^-$ ) data (c). The atom with a larger Fukui function ( $f^-$ ) is colored redder.

## References

- 1 Lamiel-Garcia O, Tosoni S, Illas F. Relative Stability of F-Covered TiO<sub>2</sub> Anatase (101) and (001) Surfaces from Periodic DFT Calculations and ab Initio Atomistic Thermodynamics. *The Journal of Physical Chemistry C*, 2014, **118**, 13667-13673.
- 2 Kowalski PM, Meyer B, Marx D. Composition, structure, and stability of the rutile-TiO<sub>2</sub>(110)surface: Oxygen depletion, hydroxylation, hydrogen migration, and water adsorption. *Physical Review B*, 2009, **79**, 115410.
- 3 Wang S, *et al.* First principles studies of CO<sub>2</sub> and O<sub>2</sub> chemisorption on La<sub>2</sub>O<sub>3</sub> surfaces. *Phys. Chem. Chem. Phys.*, 2017, **19**, 26799-26811.
- 4 Haj Lakhdar M, Smida YB, Amlouk M. Synthesis, optical characterization and DFT calculations of electronic structure of Sb<sub>2</sub>O<sub>3</sub> films obtained by thermal oxidation of Sb<sub>2</sub>S<sub>3</sub>. *J. Alloys Compd.*, 2016, **681**, 197-204.
- 5 Yuan B, Koss AR, Warneke C, Coggon M, Sekimoto K, de Gouw JA. Proton-Transfer-Reaction Mass Spectrometry: Applications in Atmospheric Sciences. *Chem. Rev.*, 2017, **117**, 13187-13229.
- 6 Gandolfo A, *et al.* Unexpectedly High Levels of Organic Compounds Released by Indoor Photocatalytic Paints. *Environ. Sci. Technol.*, 2018, **52**, 11328-11337.
